# Supplementary material
Source: PubMed Central journal article supplement (PMC4256775)
Supplement: supp_114.168377_168377SI.pdf [file supp_114.168377_168377SI.pdf]

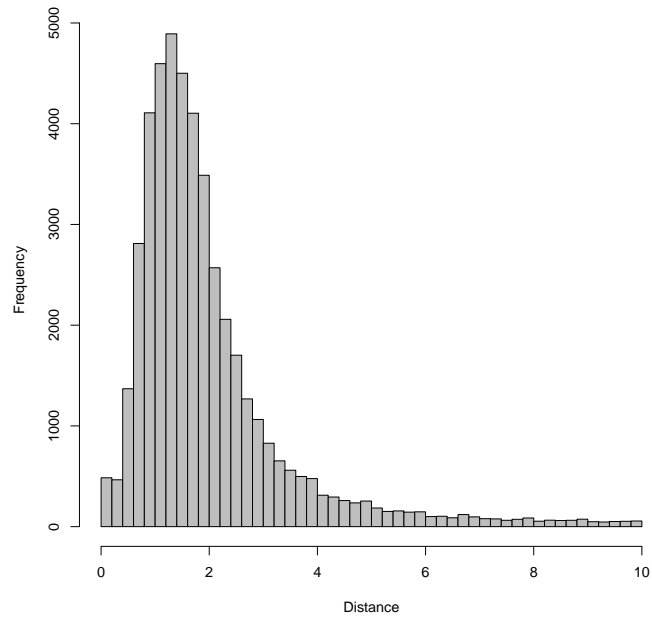

**Figure S1.** The distribution of human-chimpanzee sequence divergence for syntenic regions of humans and chimpanzees on human chromosome 21. Distance refers to the percentage of different bases across region between the two species.

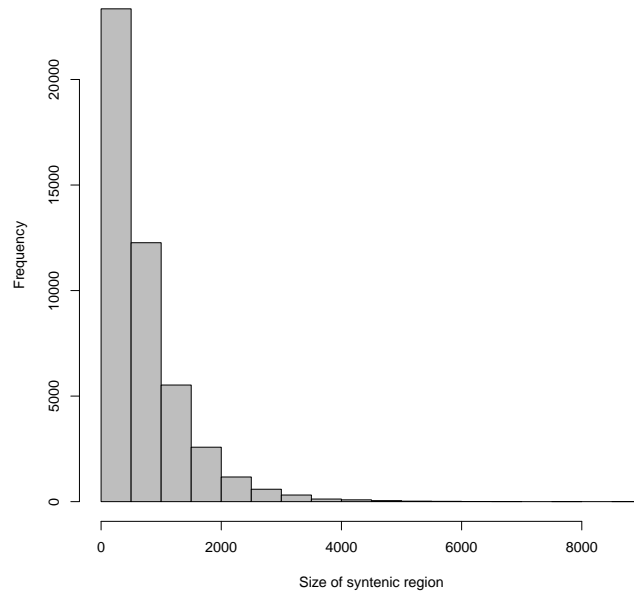

**Figure S2.** The distribution of the sizes (in bp) of syntenic regions of humans and chimpanzees on human chromosome 21.

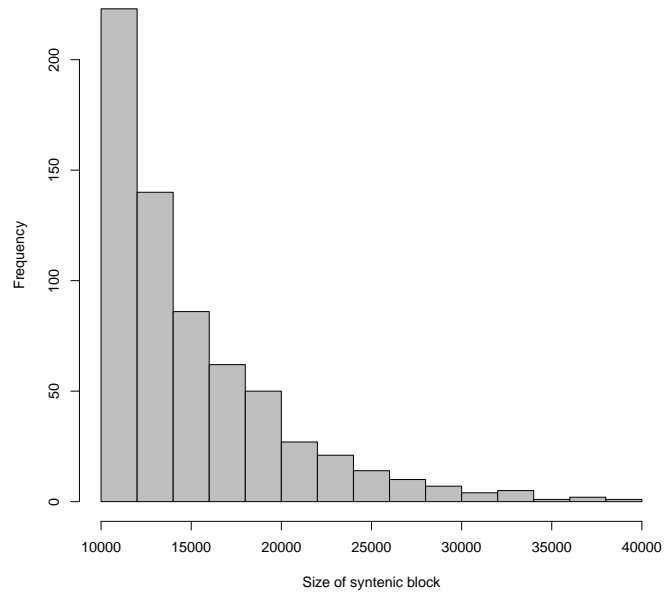

**Figure S3.** The distribution of the sizes (in bp) of syntenic blocks of humans and chimpanzees on human chromosome 21.

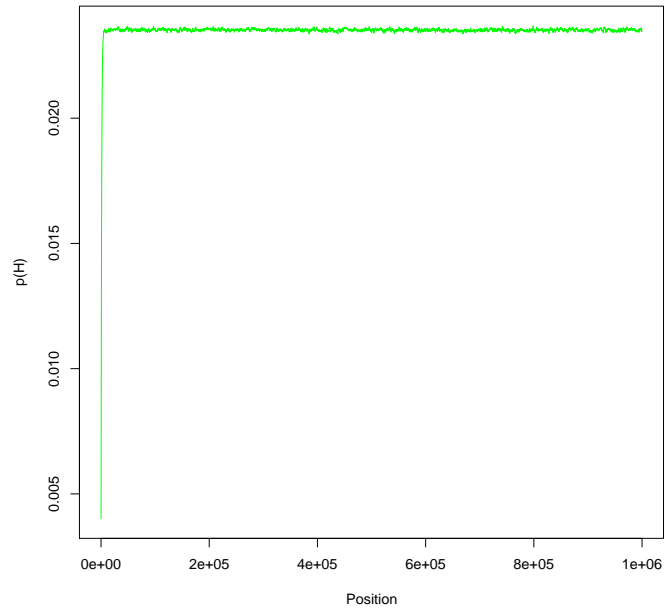

**Figure S4.** The prior probability of hotspot estimated from simulation. The parameters  $\lambda_1$  and  $\lambda_2$  were fixed to be  $1/50000$  and  $1/1000$ , respectively.

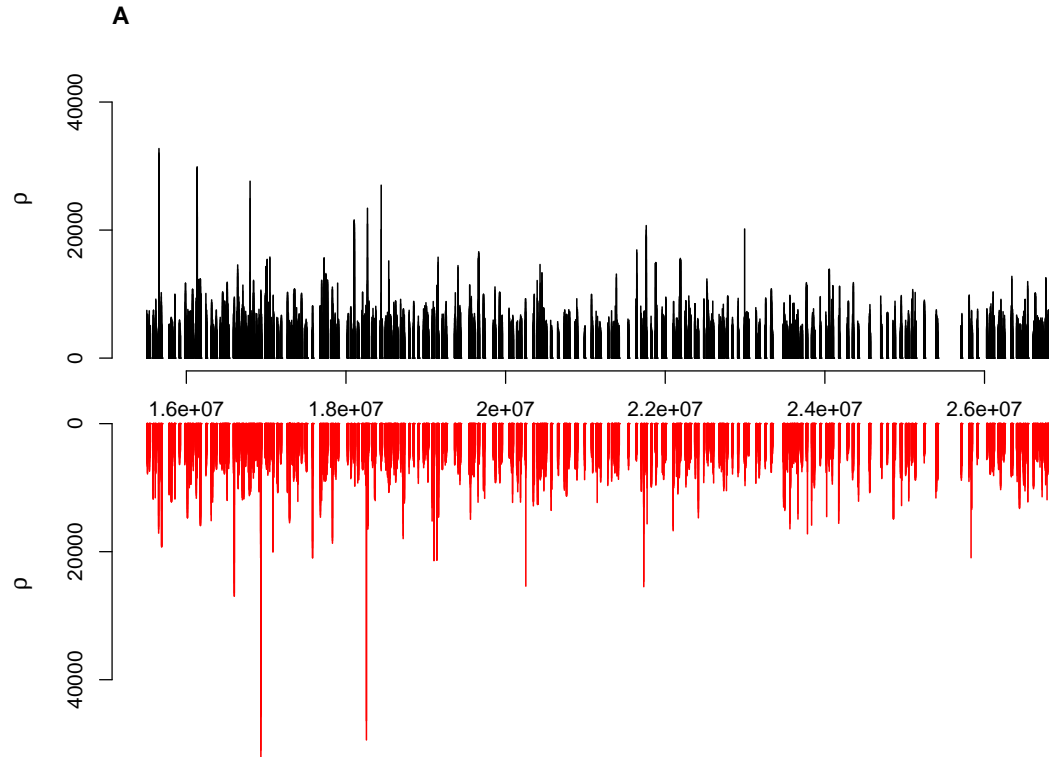

**Figure S5A.** The estimated recombination rates ( $\rho$ ) from 15504000 to 26362000 bp on chromosome 21 for YRI (black lines) and chimpanzee (red lines).

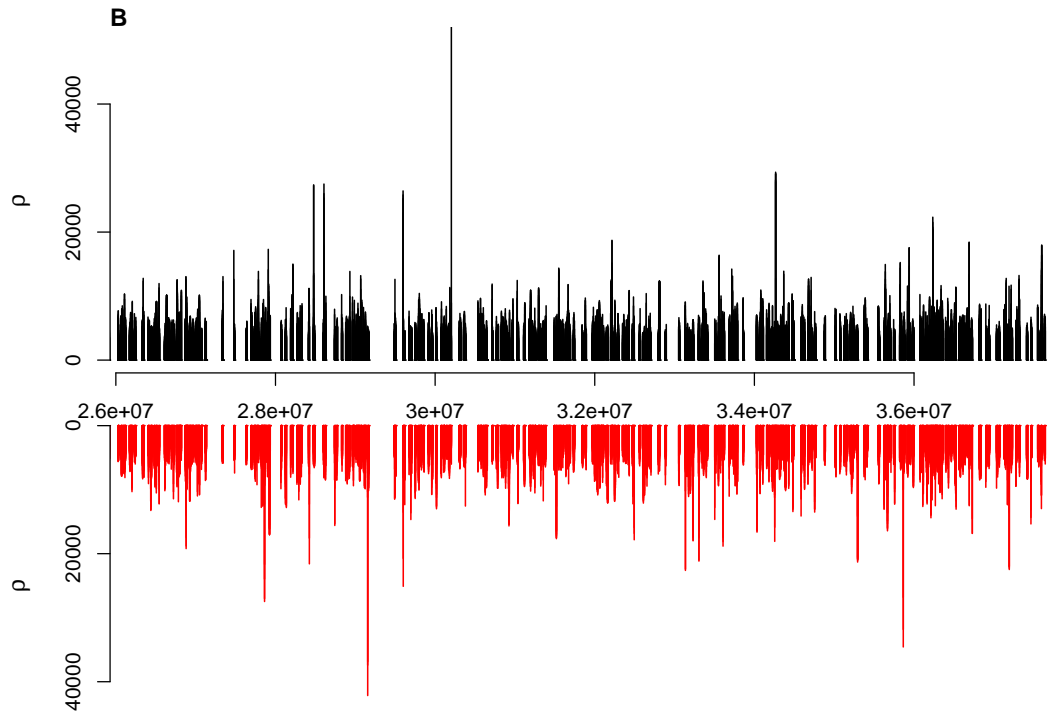

**Figure S5B.** The estimated recombination rates ( $\rho$ ) from 26362000 to 37220000 bp on chromosome 21 for YRI (black lines) and chimpanzee (red lines).

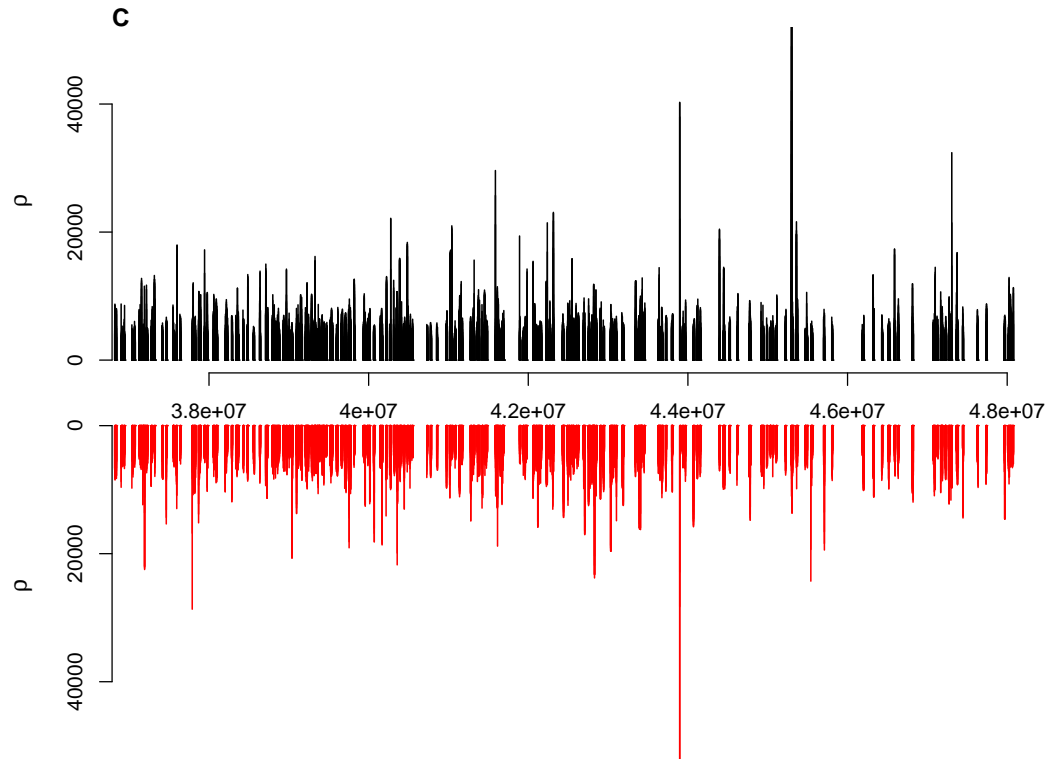

**Figure S5C.** The estimated recombination rates ( $\rho$ ) from 37220000 to 48078000 bp on chromosome 21 for YRI (black lines) and chimpanzee (red lines).

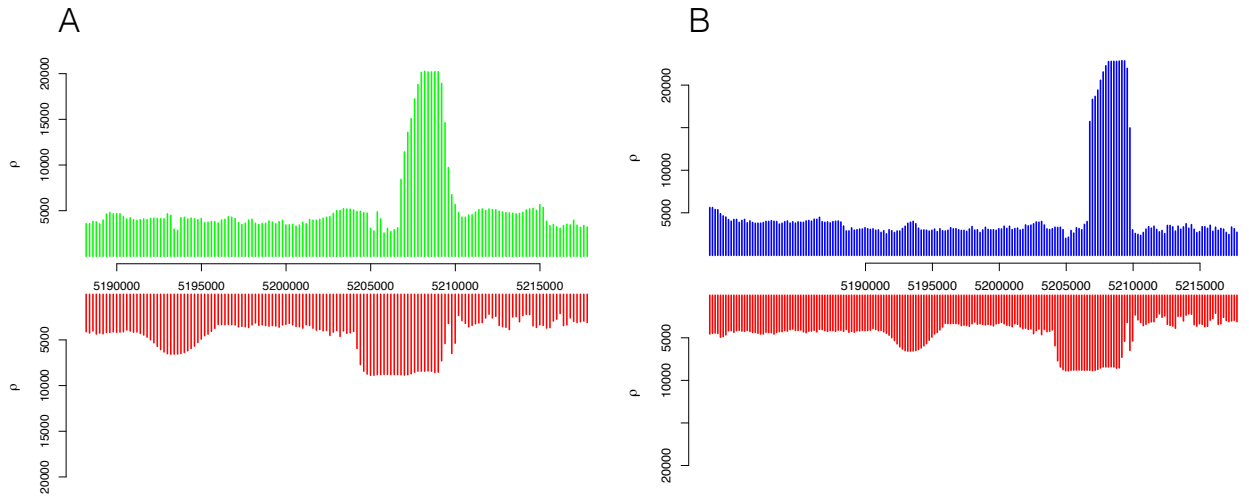

**Figure S6.** The estimated recombination rates ( $\rho$ ) across  $\beta$ -globin region using samples of Beni (green) and Chimpanzee (red) (A) and samples of CEPH (blue) and Chimpanzee (red) (B).



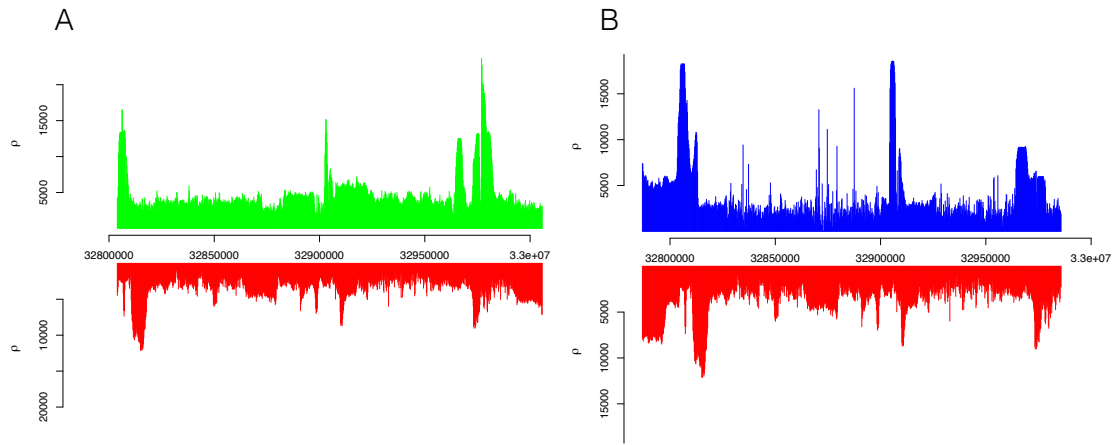

**Figure S7.** The estimated recombination rates ( $\rho$ ) across HLA region using samples of Beni (green) and Chimpanzee (red) (A) and samples of CEPH (blue) and Chimpanzee (red) B.

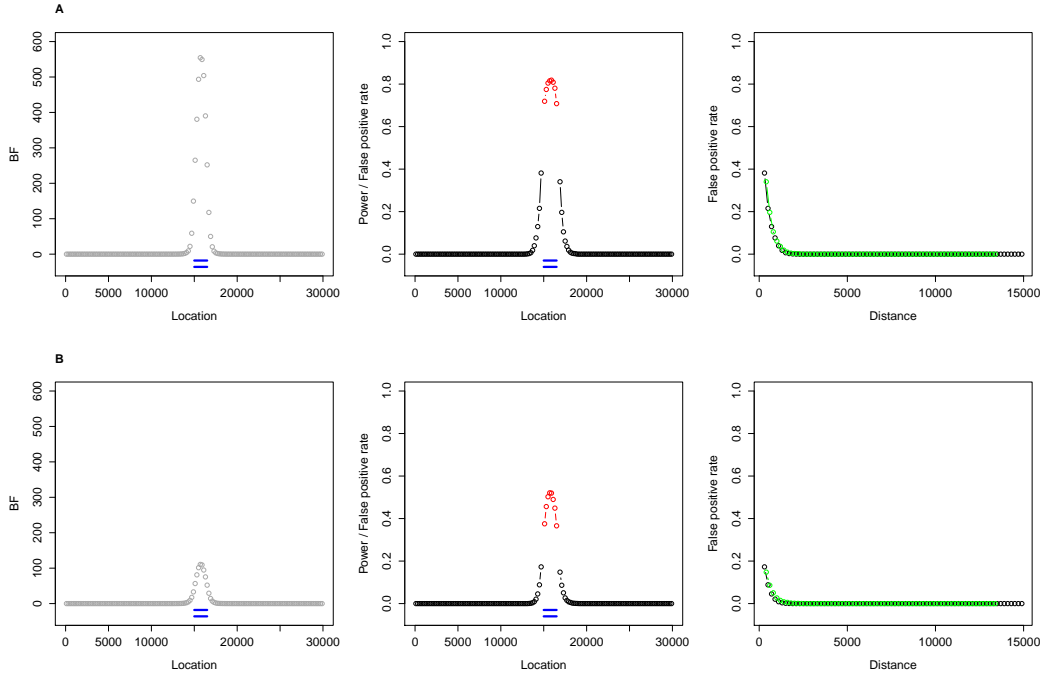

**Figure S8.** Simulation study results from set 1 (**A**) and results from set 2 (**B**). The true hotspot was located between 15 kb and 16.5 kb and indicated by blue horizontal lines. Note that the locations of the hotspot for the two species are the same, so the shared hotspot is between 15 kb and 16.5 kb. **Left panel:** The 50% quantile of the BFs of shared hotspots over locations. **Middle panel:** Power (red) and false positive rate (black) of identifying shared hotspot estimated using the 4950 pairs across locations. **Right panel:** False positive rate of identifying shared hotspot as a function of distance to the left bound of the shared hotspot (15 kb) (black dots/line) and to the right bound of the shared hotspot (16.5 kb) (green dots/line)

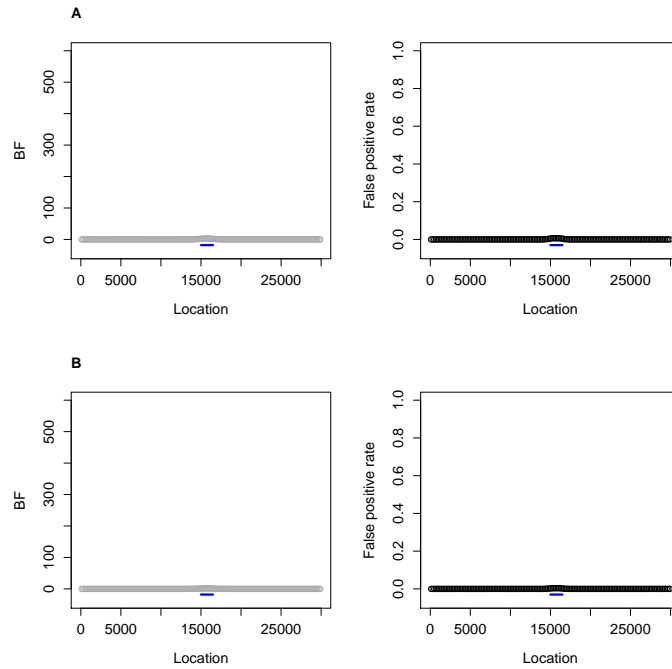

**Figure S9.** Simulation study results from set 3 (**A**) and results from set 4 (**B**). The true hotspot from one species was located between 15 kb and 16.5 kb and indicated by a blue horizontal line. Note that only one species contains a hotspot, so the shared hotspot is absent. **Left panel:** The 50% quantile of the BFs of shared hotspots over locations. **Right panel:** False positive rate of identifying shared hotspot estimated using the 10000 pairs across locations.

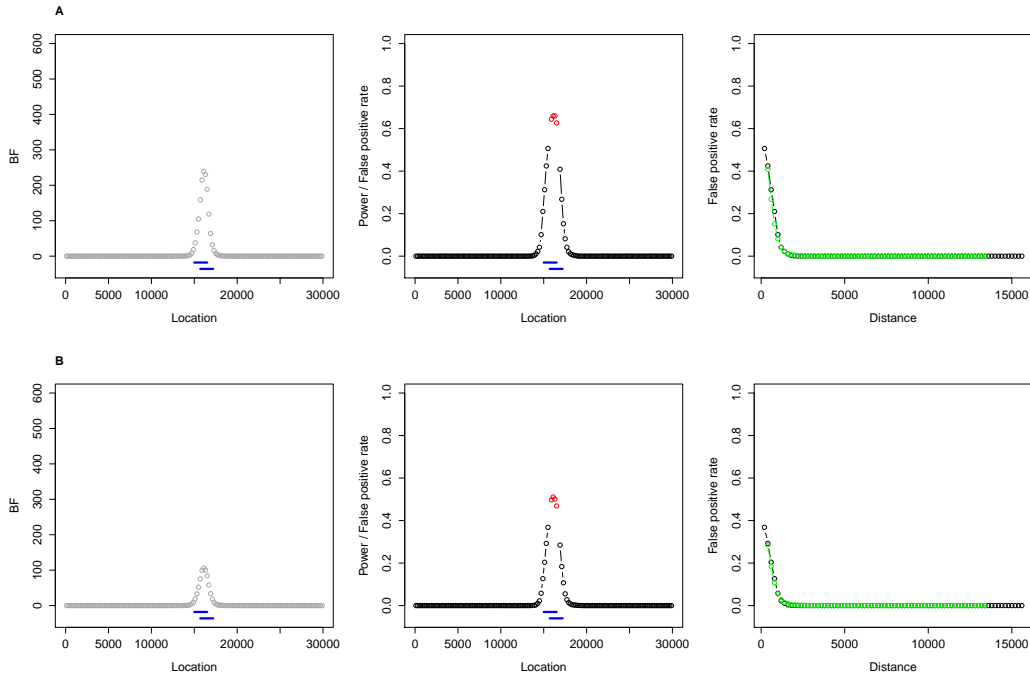

**Figure S10.** Simulation study results from set 5 (A) and results from set 6 (B). The true hotspot was located between 15 kb and 16.5 kb for one species and was located between 15.7 kb and 17.2 kb for the other species. The hotspots were indicated by blue horizontal lines. Note that the shared hotspot is between 15.7 kb and 16.5 kb. **Left panel:** The 50% quantile of the BFs of shared hotspots over locations. **Middle panel:** Power (red) and false positive rate (black) of identifying shared hotspot estimated using the 10000 pairs across locations. **Right panel:** False positive rate of identifying shared hotspot as a function of distance to the left bound of the shared hotspot (15.7 kb) (black dots/line) and to the right bound of the shared hotspot (16.5 kb) (green dots/line)

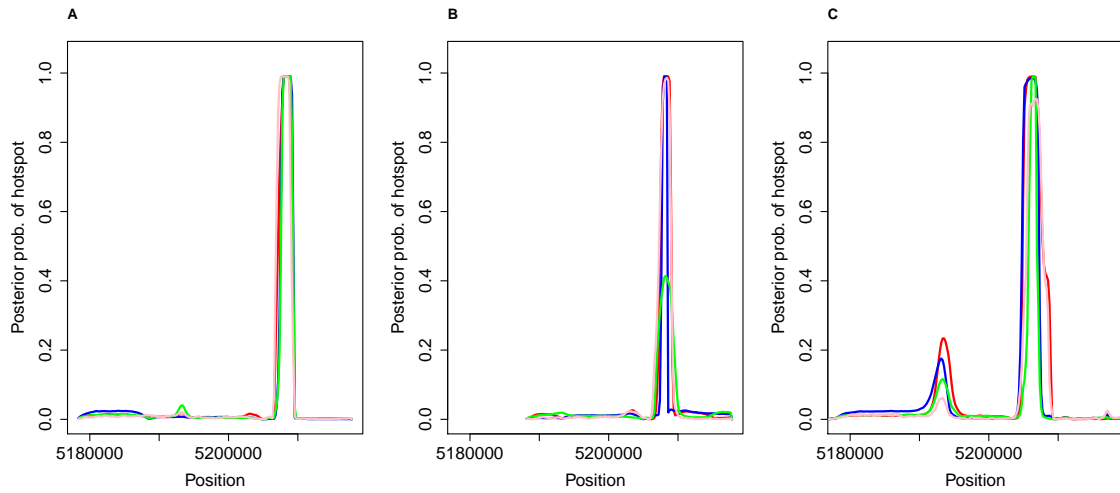

**Figure S11.** The posterior probability of hotspot across the region for CEU (A), BEN (B), Chimp (C) from four independent runs (red, blue, green, and pink lines).

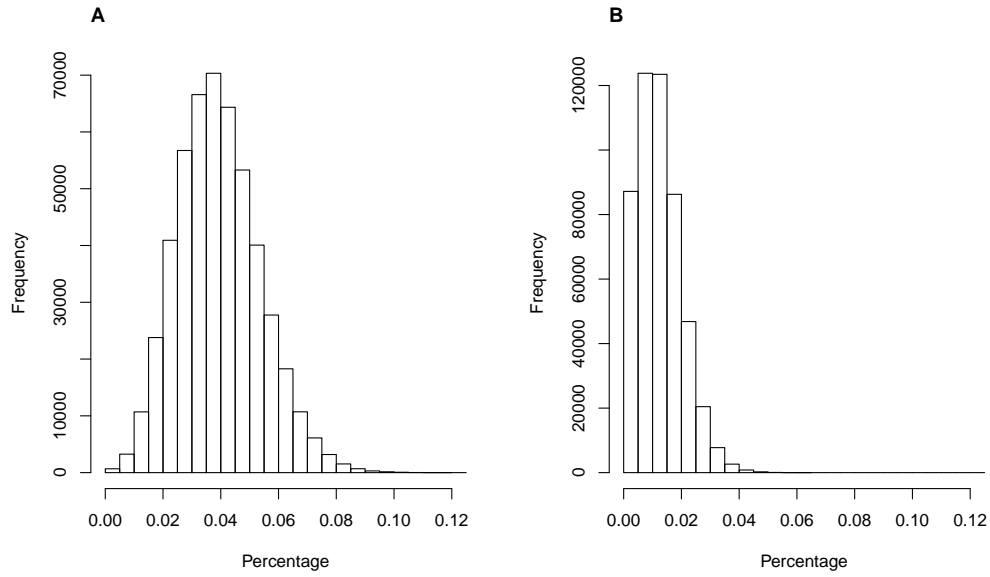

**Figure S12.** The percentage of hotspot overlapping between species calculated using simulated recombination hotspots based on the prior model used in the analysis. Either overlapping at least 1 bp (A) or 1000 bp (B) was assumed.

**Table S1.** Summary of the polymorphic data from humans and chimpanzees for the  $\beta$ -globin and HLA regions.

| Region          | Number of individuals |     |       | Number of SNPs |     |       |
|-----------------|-----------------------|-----|-------|----------------|-----|-------|
|                 | CEU                   | BEN | Chimp | CEU            | BEN | Chimp |
| $\beta$ -globin | 48                    | 47  | 38    | 26             | 30  | 39    |
| HLA             | 48                    | 47  | 37    | 111            | 98  | 114   |

**Table S2.** Positions of human recombination hotspots identified from sperm typing studies for the  $\beta$ -globin (HOLLOWAY *et al.*, 2006) and the HLA regions (JEFFREYS *et al.*, 2001) indicated in Figures 2 and 3 in the main text. The coordinates are given in both hg15 and hg19.

| Hotspot         | chr   | hg15     |          | hg19     |          |
|-----------------|-------|----------|----------|----------|----------|
|                 |       | start    | end      | start    | end      |
| $\beta$ -globin | chr11 | 5207738  | 5208938  | 5248701  | 5249901  |
| DNA1            | chr6  | 32977952 | 32979852 | 32976505 | 32978405 |
| DNA2            | chr6  | 32974244 | 32975544 | 32972797 | 32974097 |
| DNA3            | chr6  | 32966323 | 32967522 | 32964870 | 32966070 |
| DMB1            | chr6  | 32904007 | 32905807 | 32902527 | 32904327 |
| DMB2            | chr6  | 32901655 | 32901657 | 32900176 | 32900178 |
| TAP2            | chr6  | 32805677 | 32806677 | 32804157 | 32805157 |



**Table S3A.** The location, BF of shared hotspot, posterior and prior probabilities of hotspot, and recombination rate for the locations within chromosome 21 with BF of shared hotspot for YRI and chimpanzee that is  $\geq 100$ . Note that the bin size was set to be 200 bp in the analysis.

| Location | BF of shared hotspot | Posterior prob. |       | Prior prob. | $\rho$ per kb |           |
|----------|----------------------|-----------------|-------|-------------|---------------|-----------|
|          |                      | YRI             | Chimp |             | YRI           | Chimp     |
| 15656560 | 285.494              | 0.870           | 0.156 | 0.023       | 31539.316     | 6929.126  |
| 15656760 | 164.886              | 0.908           | 0.092 | 0.023       | 31667.729     | 5494.949  |
| 15656960 | 111.596              | 0.971           | 0.059 | 0.023       | 31866.629     | 4600.050  |
| 16176300 | 183.542              | 0.231           | 0.398 | 0.023       | 10007.385     | 14574.489 |
| 16176500 | 213.912              | 0.191           | 0.552 | 0.023       | 10033.589     | 15936.120 |
| 16176700 | 177.297              | 0.159           | 0.562 | 0.023       | 10029.131     | 15885.957 |
| 16176900 | 140.780              | 0.131           | 0.553 | 0.024       | 9983.577      | 15879.444 |
| 16177100 | 100.458              | 0.108           | 0.485 | 0.023       | 9964.658      | 15440.234 |
| 16512113 | 147.039              | 0.232           | 0.324 | 0.023       | 10857.111     | 10928.991 |
| 17725644 | 184.334              | 0.486           | 0.190 | 0.024       | 15400.158     | 8741.137  |
| 17725844 | 188.580              | 0.481           | 0.196 | 0.023       | 15453.427     | 8987.934  |
| 17726044 | 176.494              | 0.476           | 0.186 | 0.023       | 15535.003     | 8718.583  |
| 17726244 | 159.890              | 0.472           | 0.171 | 0.023       | 15649.587     | 8516.929  |
| 17726444 | 109.519              | 0.446           | 0.127 | 0.023       | 15632.720     | 8274.600  |
| 17742085 | 101.937              | 0.018           | 0.618 | 0.011       | 6775.410      | 8969.137  |
| 17742285 | 110.475              | 0.024           | 0.751 | 0.013       | 6825.274      | 8778.151  |
| 17742485 | 108.812              | 0.029           | 0.813 | 0.015       | 6790.138      | 8620.067  |
| 17742685 | 100.120              | 0.031           | 0.857 | 0.016       | 6876.244      | 8548.510  |
| 18441284 | 227.144              | 0.841           | 0.133 | 0.024       | 27012.989     | 7350.433  |
| 19138301 | 121.491              | 0.061           | 0.990 | 0.023       | 10145.817     | 21274.234 |
| 19138501 | 228.562              | 0.110           | 0.990 | 0.023       | 11359.481     | 21274.234 |
| 19138701 | 236.943              | 0.114           | 0.990 | 0.023       | 11330.807     | 21290.425 |
| 19254018 | 138.807              | 0.266           | 0.268 | 0.024       | 5237.969      | 6057.802  |
| 19254218 | 208.283              | 0.411           | 0.251 | 0.023       | 5847.392      | 5937.443  |
| 19254418 | 176.956              | 0.656           | 0.135 | 0.023       | 6985.160      | 5191.916  |
| 19254618 | 110.026              | 0.899           | 0.064 | 0.023       | 8421.662      | 4404.301  |
| 19926150 | 134.071              | 0.856           | 0.081 | 0.023       | 9786.664      | 8080.429  |
| 19926350 | 130.642              | 0.611           | 0.110 | 0.023       | 8873.195      | 8718.400  |
| 19926550 | 109.032              | 0.445           | 0.128 | 0.023       | 8420.547      | 8935.445  |
| 20763118 | 117.891              | 0.062           | 0.980 | 0.023       | 4821.258      | 11329.398 |
| 20763318 | 167.235              | 0.087           | 0.975 | 0.024       | 5221.899      | 11306.070 |
| 20763518 | 208.727              | 0.117           | 0.883 | 0.024       | 5596.319      | 11051.005 |
| 20763718 | 196.094              | 0.144           | 0.680 | 0.023       | 5869.359      | 10940.450 |
| 20763918 | 110.488              | 0.179           | 0.320 | 0.023       | 6464.270      | 9175.157  |
| 24783846 | 188.423              | 0.931           | 0.102 | 0.024       | 7063.042      | 5412.213  |
| 24784046 | 288.036              | 0.939           | 0.147 | 0.024       | 7095.379      | 6348.382  |
| 24784246 | 301.998              | 0.955           | 0.150 | 0.024       | 7127.590      | 6090.196  |
| 24784446 | 220.955              | 0.955           | 0.114 | 0.023       | 7127.887      | 4819.261  |
| 24784646 | 154.536              | 0.945           | 0.083 | 0.023       | 7102.932      | 3928.361  |
| 24784846 | 105.676              | 0.809           | 0.068 | 0.023       | 6834.772      | 3726.665  |

**Table S3B.** The location, BF of shared hotspot, posterior and prior probabilities of hotspot, and recombination rate for the locations within chromosome 21 with BF of shared hotspot for YRI and chimpanzee that is  $\geq 100$ . Note that the bin size was set to be 200 bp in the analysis.

| Location | BF of shared hotspot | Posterior prob. |       | Prior prob. | $\rho$ per kb |           |
|----------|----------------------|-----------------|-------|-------------|---------------|-----------|
|          |                      | YRI             | Chimp |             | YRI           | Chimp     |
| 27777974 | 188.311              | 0.736           | 0.128 | 0.023       | 6599.743      | 5083.321  |
| 27778174 | 253.744              | 0.738           | 0.166 | 0.023       | 6599.454      | 5188.921  |
| 27778374 | 284.893              | 0.735           | 0.184 | 0.023       | 6608.043      | 5106.888  |
| 27778574 | 303.014              | 0.729           | 0.196 | 0.023       | 6616.955      | 4807.713  |
| 27778774 | 337.623              | 0.709           | 0.220 | 0.023       | 6638.771      | 4821.803  |
| 27778974 | 403.944              | 0.677           | 0.268 | 0.023       | 6689.960      | 5069.792  |
| 27779174 | 420.534              | 0.611           | 0.308 | 0.023       | 6642.483      | 5422.041  |
| 27779374 | 329.147              | 0.496           | 0.309 | 0.023       | 6305.686      | 5689.206  |
| 27779574 | 232.713              | 0.399           | 0.285 | 0.024       | 6051.800      | 5714.347  |
| 27779774 | 135.506              | 0.303           | 0.230 | 0.023       | 5892.818      | 5261.390  |
| 32802712 | 106.588              | 0.706           | 0.079 | 0.023       | 10935.955     | 3665.847  |
| 32802912 | 163.649              | 0.585           | 0.142 | 0.023       | 10672.446     | 4579.081  |
| 32803112 | 101.419              | 0.307           | 0.172 | 0.023       | 10012.219     | 4888.483  |
| 32810512 | 107.456              | 0.990           | 0.057 | 0.024       | 12253.264     | 7098.364  |
| 32810712 | 100.499              | 0.990           | 0.053 | 0.024       | 12241.436     | 7030.004  |
| 33231354 | 126.159              | 0.763           | 0.085 | 0.023       | 6002.980      | 17892.281 |
| 33231554 | 160.735              | 0.773           | 0.105 | 0.023       | 5999.274      | 17992.985 |
| 33231754 | 177.498              | 0.777           | 0.115 | 0.024       | 6002.654      | 17483.822 |
| 33231954 | 175.287              | 0.782           | 0.113 | 0.023       | 6030.923      | 15835.609 |
| 33232154 | 149.576              | 0.790           | 0.097 | 0.023       | 6093.150      | 13010.088 |
| 33232354 | 105.112              | 0.798           | 0.069 | 0.023       | 6181.327      | 8416.882  |
| 36526950 | 161.245              | 0.094           | 0.872 | 0.024       | 5689.540      | 12675.394 |
| 36527150 | 192.922              | 0.115           | 0.840 | 0.024       | 7023.180      | 13048.529 |
| 38639126 | 211.700              | 0.111           | 0.943 | 0.023       | 6955.501      | 7719.173  |
| 38639326 | 640.579              | 0.272           | 0.958 | 0.023       | 13896.870     | 7722.063  |
| 38639526 | 644.525              | 0.273           | 0.963 | 0.023       | 13650.934     | 7721.398  |
| 38639726 | 468.696              | 0.218           | 0.945 | 0.024       | 11312.170     | 7696.826  |
| 38639926 | 229.270              | 0.165           | 0.683 | 0.023       | 9802.986      | 7655.443  |
| 39039063 | 211.825              | 0.241           | 0.420 | 0.023       | 5590.545      | 17544.685 |
| 39039263 | 532.540              | 0.331           | 0.670 | 0.023       | 5842.511      | 19470.258 |
| 39039463 | 774.496              | 0.355           | 0.830 | 0.023       | 5846.362      | 20047.953 |
| 39039663 | 900.318              | 0.331           | 0.990 | 0.023       | 5515.199      | 20643.148 |
| 39039863 | 832.826              | 0.315           | 0.990 | 0.023       | 5368.431      | 20658.812 |
| 39040063 | 239.249              | 0.304           | 0.381 | 0.023       | 5355.595      | 20690.915 |

**Table S3C.** The location, BF of shared hotspot, posterior and prior probabilities of hotspot, and recombination rate for the locations within chromosome 21 with BF of shared hotspot for YRI and chimpanzee that is  $\geq 100$ . Note that the bin size was set to be 200 bp in the analysis.

| Location | BF of shared hotspot | Posterior prob. |       | Prior prob. | $\rho$ per kb |           |
|----------|----------------------|-----------------|-------|-------------|---------------|-----------|
|          |                      | YRI             | Chimp |             | YRI           | Chimp     |
| 40014559 | 129.356              | 0.078           | 0.857 | 0.024       | 5695.848      | 11674.009 |
| 40014759 | 183.894              | 0.108           | 0.855 | 0.024       | 6243.054      | 11712.068 |
| 40014959 | 239.070              | 0.137           | 0.855 | 0.024       | 6727.649      | 11733.253 |
| 40015159 | 270.714              | 0.154           | 0.848 | 0.024       | 6943.860      | 11781.198 |
| 40015359 | 287.940              | 0.168           | 0.822 | 0.024       | 7660.602      | 11845.215 |
| 40015559 | 166.870              | 0.160           | 0.527 | 0.024       | 7913.520      | 10115.673 |
| 40276752 | 168.105              | 0.172           | 0.493 | 0.023       | 14171.093     | 8830.327  |
| 40276952 | 528.521              | 0.737           | 0.307 | 0.024       | 22147.608     | 8162.475  |
| 40277152 | 297.215              | 0.775           | 0.183 | 0.024       | 22035.319     | 7650.460  |
| 40316392 | 133.867              | 0.117           | 0.573 | 0.023       | 3102.026      | 4172.360  |
| 40316592 | 159.642              | 0.136           | 0.581 | 0.023       | 3226.749      | 4225.450  |
| 40316792 | 184.309              | 0.152           | 0.597 | 0.023       | 3354.056      | 4403.064  |
| 40316992 | 198.542              | 0.163           | 0.597 | 0.023       | 3442.941      | 4415.224  |
| 40317192 | 204.654              | 0.171           | 0.591 | 0.023       | 3471.018      | 4379.222  |
| 40317392 | 199.521              | 0.181           | 0.548 | 0.023       | 3512.845      | 4147.033  |
| 40317592 | 188.951              | 0.195           | 0.483 | 0.023       | 3608.689      | 4063.566  |
| 40317792 | 181.629              | 0.216           | 0.421 | 0.023       | 4183.590      | 4049.927  |
| 40317992 | 168.738              | 0.238           | 0.358 | 0.023       | 4987.293      | 4058.472  |
| 40318192 | 137.340              | 0.248           | 0.285 | 0.024       | 5112.354      | 4012.951  |
| 41143825 | 181.261              | 0.462           | 0.198 | 0.024       | 6220.698      | 3541.143  |
| 41144025 | 210.568              | 0.526           | 0.199 | 0.024       | 6247.228      | 3489.888  |
| 41144225 | 244.985              | 0.591           | 0.202 | 0.024       | 6446.650      | 3453.253  |
| 41144425 | 262.282              | 0.617           | 0.206 | 0.024       | 6570.222      | 3451.275  |
| 41144625 | 251.811              | 0.584           | 0.210 | 0.024       | 6439.340      | 3465.952  |
| 41144825 | 220.723              | 0.513           | 0.212 | 0.024       | 6291.991      | 3475.548  |
| 41145025 | 205.815              | 0.477           | 0.214 | 0.024       | 6201.248      | 3479.447  |
| 41145225 | 205.056              | 0.476           | 0.214 | 0.023       | 6370.582      | 3472.832  |
| 41145425 | 199.117              | 0.461           | 0.214 | 0.023       | 6433.713      | 3477.599  |
| 41145625 | 167.788              | 0.394           | 0.215 | 0.023       | 6270.621      | 3481.081  |
| 41277919 | 209.166              | 0.177           | 0.477 | 0.021       | 6037.182      | 10536.394 |
| 41278119 | 321.375              | 0.252           | 0.514 | 0.021       | 6771.420      | 10607.349 |
| 41278319 | 321.469              | 0.256           | 0.523 | 0.022       | 6729.899      | 10593.630 |
| 41278519 | 295.549              | 0.245           | 0.519 | 0.022       | 6383.708      | 10598.074 |
| 41278719 | 250.905              | 0.227           | 0.494 | 0.022       | 5954.922      | 10656.032 |
| 41278919 | 170.159              | 0.192           | 0.416 | 0.023       | 5525.400      | 10736.870 |
| 41383598 | 121.176              | 0.190           | 0.330 | 0.023       | 7128.685      | 6481.764  |
| 41383798 | 217.252              | 0.234           | 0.457 | 0.023       | 8032.590      | 6753.986  |
| 41383998 | 301.386              | 0.214           | 0.666 | 0.023       | 7475.461      | 7357.192  |
| 41384198 | 268.828              | 0.183           | 0.710 | 0.024       | 6950.994      | 7398.506  |
| 41384398 | 222.401              | 0.147           | 0.746 | 0.024       | 6662.363      | 7435.505  |
| 41384598 | 153.612              | 0.103           | 0.761 | 0.024       | 6467.212      | 7450.173  |
| 41612186 | 104.358              | 0.074           | 0.736 | 0.023       | 11466.139     | 12251.212 |

**Table S3D.** The location, BF of shared hotspot, posterior and prior probabilities of hotspot, and recombination rate for the locations within chromosome 21 with BF of shared hotspot for YRI and chimpanzee that is  $\geq 100$ . Note that the bin size was set to be 200 bp in the analysis.

| Location | BF of shared hotspot | Posterior prob. |       | Prior prob. | $\rho$ per kb |           |
|----------|----------------------|-----------------|-------|-------------|---------------|-----------|
|          |                      | YRI             | Chimp |             | YRI           | Chimp     |
| 42059206 | 135.427              | 0.209           | 0.139 | 0.015       | 12562.039     | 11208.861 |
| 42059406 | 131.325              | 0.211           | 0.163 | 0.016       | 13694.442     | 11318.255 |
| 42226149 | 626.224              | 0.920           | 0.011 | 0.004       | 12325.392     | 5020.142  |
| 42226349 | 410.638              | 0.972           | 0.024 | 0.008       | 12264.831     | 5103.089  |
| 42226549 | 481.869              | 0.986           | 0.052 | 0.011       | 12222.542     | 5750.803  |
| 42226749 | 596.665              | 0.983           | 0.092 | 0.013       | 12158.181     | 8700.793  |
| 42226949 | 655.856              | 0.979           | 0.129 | 0.015       | 12129.305     | 9504.365  |
| 42227149 | 501.579              | 0.775           | 0.155 | 0.016       | 12079.859     | 9233.073  |
| 42227349 | 168.123              | 0.289           | 0.174 | 0.018       | 10833.864     | 9022.659  |
| 42238349 | 107.716              | 0.735           | 0.076 | 0.023       | 21446.246     | 8928.534  |
| 42570781 | 115.065              | 0.310           | 0.192 | 0.023       | 6233.344      | 7506.878  |
| 42570981 | 108.709              | 0.324           | 0.175 | 0.024       | 6480.774      | 6740.126  |
| 42571181 | 107.410              | 0.307           | 0.183 | 0.024       | 6578.037      | 6684.103  |
| 42571381 | 104.378              | 0.249           | 0.220 | 0.024       | 6368.259      | 7095.729  |
| 42819800 | 105.549              | 0.970           | 0.056 | 0.023       | 11806.235     | 5158.828  |
| 42820000 | 292.836              | 0.958           | 0.145 | 0.023       | 11831.413     | 7030.569  |
| 42820200 | 356.870              | 0.521           | 0.315 | 0.023       | 9029.626      | 9422.601  |
| 42820400 | 225.951              | 0.312           | 0.355 | 0.023       | 6618.535      | 9853.427  |
| 42820600 | 180.871              | 0.259           | 0.351 | 0.023       | 6419.125      | 9837.760  |
| 43897282 | 3060835.838          | 0.990           | 0.990 | 0.004       | 40191.718     | 90686.510 |
| 43897482 | 150708.119           | 0.957           | 0.938 | 0.008       | 40266.913     | 89782.656 |
| 43897682 | 561.031              | 0.430           | 0.137 | 0.011       | 37978.474     | 28271.525 |
| 46327614 | 191.394              | 0.232           | 0.412 | 0.023       | 6406.955      | 10933.605 |
| 46327814 | 1020.907             | 0.443           | 0.812 | 0.023       | 7173.002      | 11046.233 |
| 46328014 | 2208.526             | 0.610           | 0.899 | 0.023       | 7994.535      | 11116.588 |
| 46328214 | 2598.796             | 0.644           | 0.912 | 0.023       | 8039.030      | 11142.919 |
| 46328414 | 2488.649             | 0.650           | 0.889 | 0.023       | 8014.472      | 11157.102 |
| 46328614 | 1481.975             | 0.642           | 0.700 | 0.023       | 8010.726      | 10980.290 |
| 46328814 | 362.140              | 0.623           | 0.267 | 0.023       | 7975.626      | 9450.552  |
| 46329014 | 132.833              | 0.614           | 0.111 | 0.024       | 7968.658      | 8636.293  |
| 46813401 | 282.342              | 0.247           | 0.427 | 0.020       | 8419.912      | 9646.114  |
| 46813601 | 2236.206             | 0.842           | 0.590 | 0.021       | 11898.599     | 10162.635 |
| 46813801 | 2676.036             | 0.885           | 0.625 | 0.021       | 11932.661     | 10520.865 |
| 46814001 | 1655.596             | 0.736           | 0.602 | 0.022       | 11264.752     | 10452.088 |
| 46814201 | 284.072              | 0.326           | 0.376 | 0.022       | 8426.337      | 9852.642  |
| 47272127 | 111.177              | 0.383           | 0.151 | 0.023       | 9433.282      | 11739.240 |
| 47305828 | 247.356              | 0.161           | 0.745 | 0.023       | 21436.346     | 9604.348  |
| 47306028 | 1960.835             | 0.952           | 0.545 | 0.023       | 32402.412     | 9181.073  |

**Table S4.** The location, BF of shared hotspot, posterior and prior probabilities of hotspot, and recombination rate for the locations within  $\beta$ -globin region with BF of shared hotspot for Beni and chimpanzee that is  $\geq 100$ . Note that the bin size was set to be 200 bp in the analysis.

| Location | BF of shared hotspot | Posterior prob. |       | Prior prob. |       | $\rho$ per kb |         |
|----------|----------------------|-----------------|-------|-------------|-------|---------------|---------|
|          |                      | Beni            | Chimp | Beni        | Chimp | Beni          | Chimp   |
| 5207191  | 135.56               | 0.08            | 0.89  | 0.02        | 0.02  | 13586.45      | 8816.91 |
| 5207391  | 355.93               | 0.21            | 0.79  | 0.02        | 0.02  | 15075.34      | 8714.64 |
| 5207591  | 842.27               | 0.50            | 0.64  | 0.02        | 0.02  | 17242.87      | 8537.15 |
| 5207791  | 1274.07              | 0.81            | 0.51  | 0.02        | 0.02  | 18809.18      | 8420.40 |
| 5207991  | 1350.57              | 0.96            | 0.45  | 0.02        | 0.02  | 20149.54      | 8419.20 |
| 5208191  | 1286.51              | 0.99            | 0.42  | 0.02        | 0.02  | 20258.55      | 8418.88 |
| 5208391  | 1241.97              | 0.99            | 0.41  | 0.02        | 0.02  | 20194.92      | 8400.70 |
| 5208591  | 1180.78              | 0.99            | 0.40  | 0.02        | 0.02  | 20197.72      | 8427.60 |
| 5208791  | 884.80               | 0.99            | 0.33  | 0.02        | 0.02  | 20227.12      | 8566.47 |
| 5208991  | 290.92               | 0.98            | 0.14  | 0.02        | 0.02  | 20220.12      | 8529.29 |

**Table S5.** The location, BF of shared hotspot, posterior and prior probabilities of hotspot, and recombination rate for the locations within  $\beta$ -globin region with BF of shared hotspot for CEPH and chimpanzee that is  $\geq 100$ . Note that the bin size was set to be 200 bp in the analysis.

| Location | BF of shared hotspot | Posterior prob. |       | Prior prob. |       | $\rho$ per kb |         |
|----------|----------------------|-----------------|-------|-------------|-------|---------------|---------|
|          |                      | CEPH            | Chimp | CEPH        | Chimp | CEPH          | Chimp   |
| 5206961  | 371.22               | 0.18            | 0.93  | 0.02        | 0.02  | 18326.23      | 8852.13 |
| 5207161  | 839.78               | 0.36            | 0.89  | 0.02        | 0.02  | 18673.54      | 8816.91 |
| 5207361  | 1331.00              | 0.54            | 0.79  | 0.02        | 0.02  | 19411.68      | 8714.64 |
| 5207561  | 1511.18              | 0.71            | 0.64  | 0.02        | 0.02  | 20566.67      | 8537.15 |
| 5207761  | 1328.14              | 0.83            | 0.51  | 0.02        | 0.02  | 21541.59      | 8420.40 |
| 5207961  | 1256.48              | 0.92            | 0.45  | 0.02        | 0.02  | 22266.50      | 8419.20 |
| 5208161  | 1286.98              | 0.99            | 0.42  | 0.02        | 0.02  | 22760.68      | 8418.88 |
| 5208361  | 1243.76              | 0.99            | 0.41  | 0.02        | 0.02  | 22787.70      | 8400.70 |
| 5208561  | 1180.72              | 0.99            | 0.40  | 0.02        | 0.02  | 22788.52      | 8427.60 |
| 5208761  | 883.43               | 0.99            | 0.33  | 0.02        | 0.02  | 22787.79      | 8566.47 |
| 5208961  | 295.27               | 0.99            | 0.14  | 0.02        | 0.02  | 22814.71      | 8529.29 |

**Table S6.** The location, BF of shared hotspot, posterior and prior probabilities of hotspot, and recombination rate for the locations within HLA region with BF of shared hotspot for Beni and chimpanzee that is  $\geq 100$ . Note that the bin size was set to be 200 bp in the analysis.

| Location | BF of shared hotspot | Posterior prob. |       | Prior prob. |       | $\rho$ per kb |          |
|----------|----------------------|-----------------|-------|-------------|-------|---------------|----------|
|          |                      | Beni            | Chimp | Beni        | Chimp | Beni          | Chimp    |
| 32806970 | 143.693              | 0.485           | 0.146 | 0.022       | 0.024 | 13405.120     | 6546.155 |
| 32807170 | 148.140              | 0.449           | 0.163 | 0.023       | 0.024 | 13494.462     | 7360.673 |

**Table S7.** The location, BF of shared hotspot, posterior and prior probabilities of hotspot, and recombination rate for the locations within HLA region with BF of shared hotspot for CEPH and chimpanzee that is  $\geq 100$ . Note that the bin size was set to be 200 bp in the analysis.

| Location | BF of shared hotspot | Posterior prob. |       | Prior prob. |       | $\rho$ per kb |          |
|----------|----------------------|-----------------|-------|-------------|-------|---------------|----------|
|          |                      | CEPH            | Chimp | CEPH        | Chimp | CEPH          | Chimp    |
| 32806899 | 168.752              | 0.990           | 0.086 | 0.024       | 0.024 | 18246.979     | 4179.673 |
| 32807099 | 245.422              | 0.823           | 0.146 | 0.024       | 0.024 | 17367.281     | 6546.155 |
| 32807299 | 239.016              | 0.718           | 0.163 | 0.024       | 0.024 | 15555.192     | 7360.673 |
| 32807499 | 167.397              | 0.634           | 0.134 | 0.023       | 0.024 | 13960.294     | 6622.008 |
| 32902299 | 100.630              | 0.629           | 0.084 | 0.024       | 0.024 | 3603.851      | 3096.905 |
| 32902499 | 108.641              | 0.604           | 0.094 | 0.024       | 0.024 | 3584.889      | 3095.336 |



## References

HOLLOWAY, K., V. E. LAWSON, and A. J. JEFFREYS, 2006 Allelic recombination and de novo deletions in sperm in the human beta-globin gene region. *Human Molecular Genetics* **15**: 1099–1111.

JEFFREYS, A. J., L. KAUPPI, and R. NEUMANN, 2001 Intensely punctate meiotic recombination in the class ii region of the major histocompatibility complex. *Nature Genetics* **29**: 217–222.
