# Supplementary material
Source: PubMed Central journal article supplement (PMC4256775)
Supplement: supp_114.168377_FigureS1.pdf [file supp_114.168377_FigureS1.pdf]

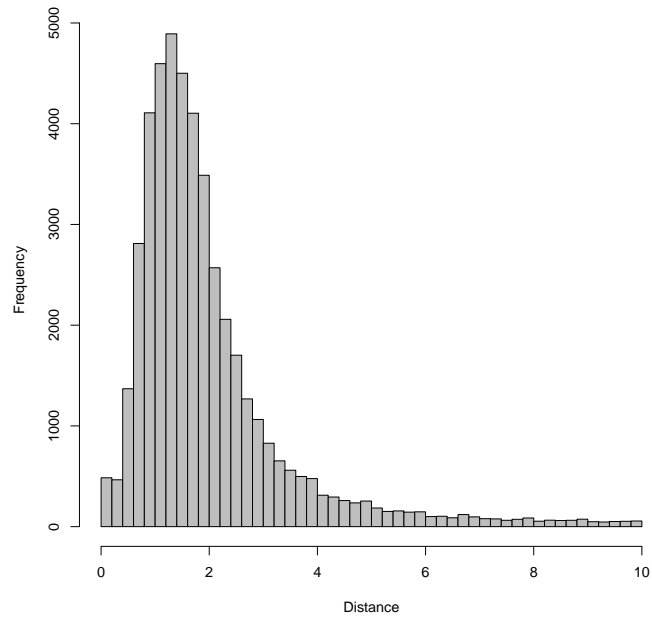

**Figure S1.** The distribution of human-chimpanzee sequence divergence for syntenic regions of humans and chimpanzees on human chromosome 21. Distance refers to the percentage of different bases across region between the two species.
