# Supplementary material
Source: PubMed Central journal article supplement (PMC4256775)
Supplement: supp_114.168377_FigureS2.pdf [file supp_114.168377_FigureS2.pdf]

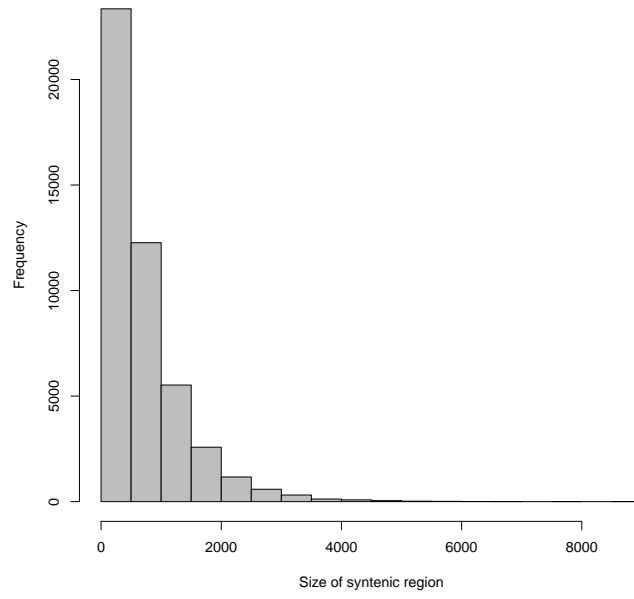

**Figure S2.** The distribution of the sizes (in bp) of syntenic regions of humans and chimpanzees on human chromosome 21.
