# Supplementary material
Source: PubMed Central journal article supplement (PMC4256775)
Supplement: supp_114.168377_FigureS3.pdf [file supp_114.168377_FigureS3.pdf]

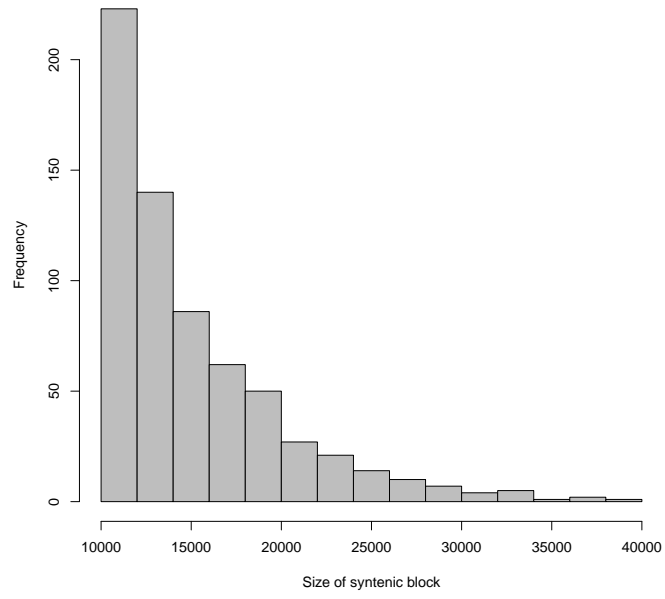

**Figure S3.** The distribution of the sizes (in bp) of syntenic blocks of humans and chimpanzees on human chromosome 21.
