# Supplementary material
Source: PubMed Central journal article supplement (PMC4256775)
Supplement: supp_114.168377_FigureS4.pdf [file supp_114.168377_FigureS4.pdf]

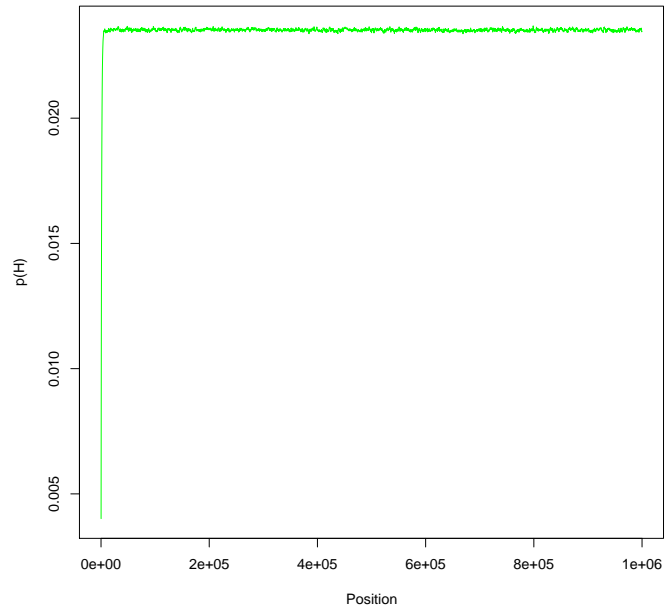

**Figure S4.** The prior probability of hotspot estimated from simulation. The parameters  $\lambda_1$  and  $\lambda_2$  were fixed to be  $1/50000$  and  $1/1000$ , respectively.
