# Supplementary material
Source: PubMed Central journal article supplement (PMC4256775)
Supplement: supp_114.168377_FigureS6.pdf [file supp_114.168377_FigureS6.pdf]

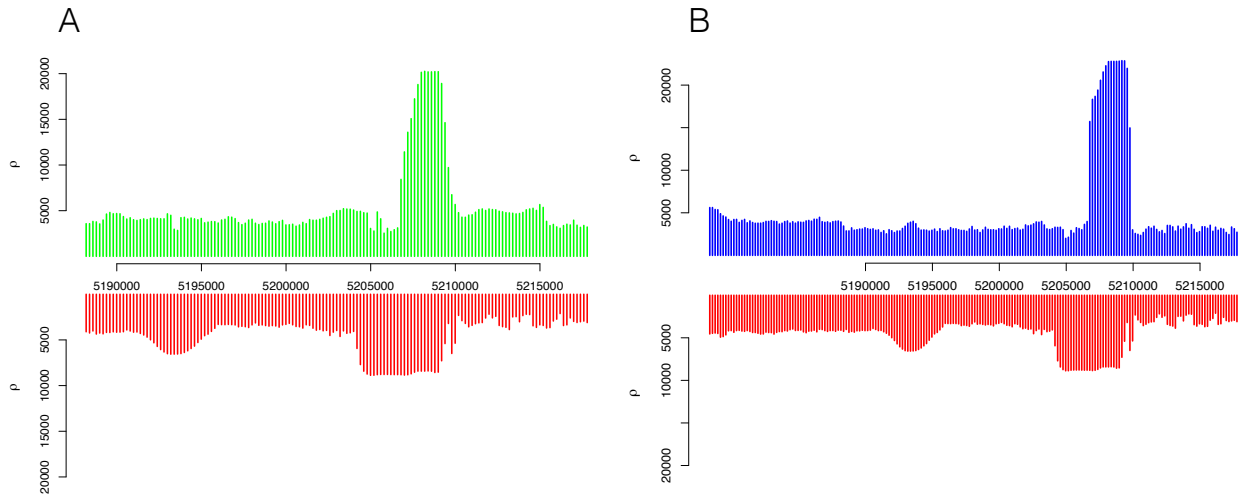

**Figure S6.** The estimated recombination rates ( $\rho$ ) across  $\beta$ -globin region using samples of Beni (green) and Chimpanzee (red) (A) and samples of CEPH (blue) and Chimpanzee (red) (B).
