# Supplementary material
Source: PubMed Central journal article supplement (PMC4256775)
Supplement: supp_114.168377_FigureS7.pdf [file supp_114.168377_FigureS7.pdf]

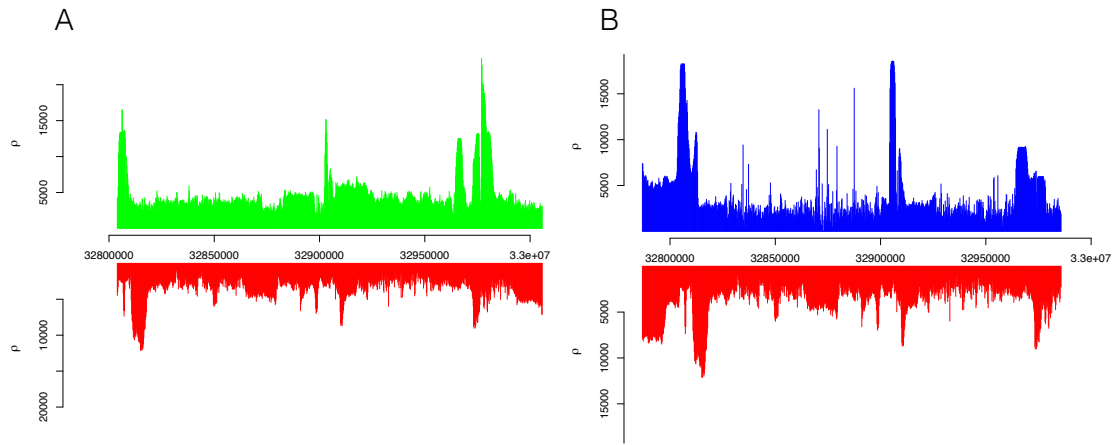

**Figure S7.** The estimated recombination rates ( $\rho$ ) across HLA region using samples of Beni (green) and Chimpanzee (red) (A) and samples of CEPH (blue) and Chimpanzee (red) B.
