# Supplementary material
Source: PubMed Central journal article supplement (PMC4256775)
Supplement: supp_114.168377_FigureS9.pdf [file supp_114.168377_FigureS9.pdf]

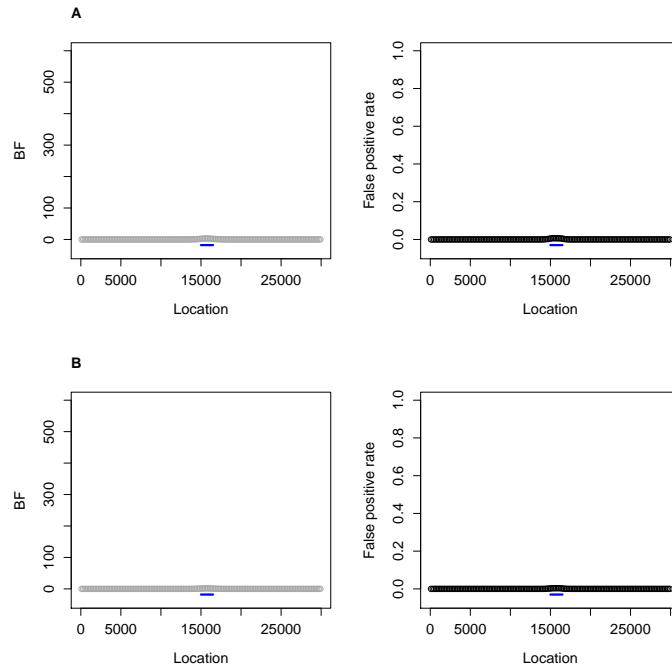

**Figure S9.** Simulation study results from set 3 (**A**) and results from set 4 (**B**). The true hotspot from one species was located between 15 kb and 16.5 kb and indicated by a blue horizontal line. Note that only one species contains a hotspot, so the shared hotspot is absent. **Left panel:** The 50% quantile of the BFs of shared hotspots over locations. **Right panel:** False positive rate of identifying shared hotspot estimated using the 10000 pairs across locations.
