# Supplementary material
Source: PubMed Central journal article supplement (PMC4256775)
Supplement: supp_114.168377_FigureS11.pdf [file supp_114.168377_FigureS11.pdf]

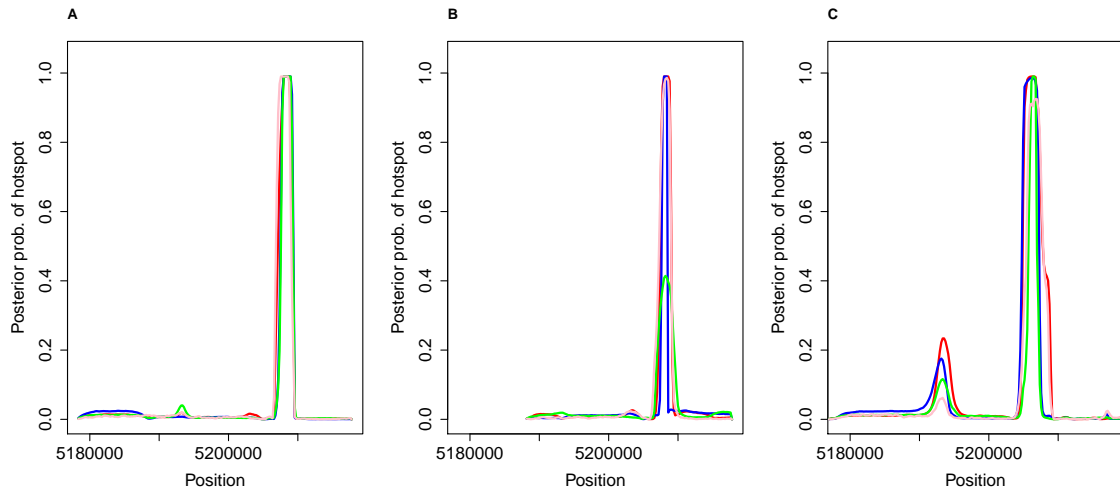

**Figure S11.** The posterior probability of hotspot across the region for CEU (A), BEN (B), Chimp (C) from four independent runs (red, blue, green, and pink lines).
