# Supplementary material
Source: PubMed Central journal article supplement (PMC4256775)
Supplement: supp_114.168377_FigureS12.pdf [file supp_114.168377_FigureS12.pdf]

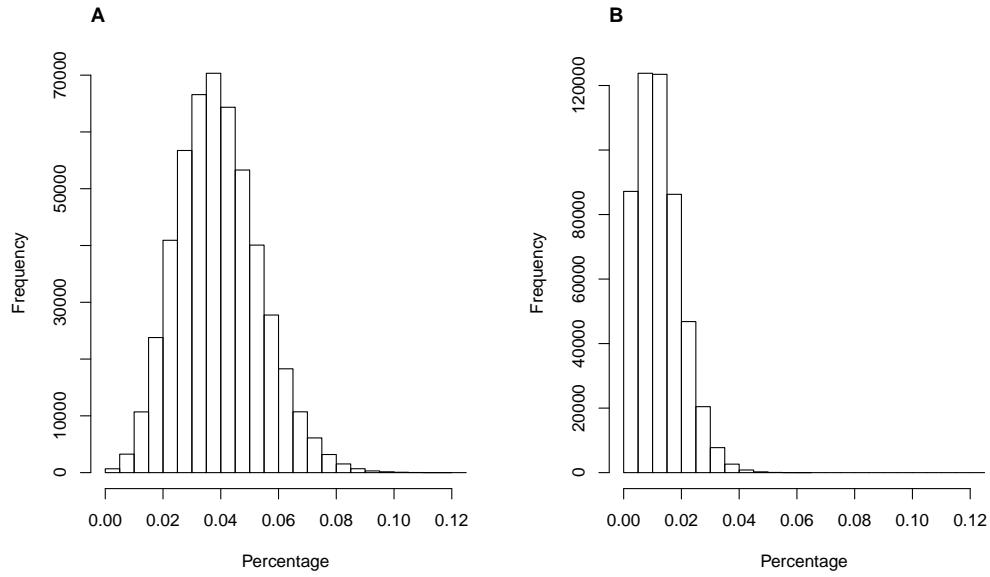

**Figure S12.** The percentage of hotspot overlapping between species calculated using simulated recombination hotspots based on the prior model used in the analysis. Either overlapping at least 1 bp (A) or 1000 bp (B) was assumed.
