# Supplementary material
Source: PubMed Central journal article supplement (PMC4256775)
Supplement: supp_114.168377_TableS1.pdf [file supp_114.168377_TableS1.pdf]

**Table S1.** Summary of the polymorphic data from humans and chimpanzees for the  $\beta$ -globin and HLA regions.

| Region          | Number of individuals |     |       | Number of SNPs |     |       |
|-----------------|-----------------------|-----|-------|----------------|-----|-------|
|                 | CEU                   | BEN | Chimp | CEU            | BEN | Chimp |
| $\beta$ -globin | 48                    | 47  | 38    | 26             | 30  | 39    |
| HLA             | 48                    | 47  | 37    | 111            | 98  | 114   |
