# Supplementary material
Source: PubMed Central journal article supplement (PMC4256775)
Supplement: supp_114.168377_TableS2.pdf [file supp_114.168377_TableS2.pdf]

**Table S2.** Positions of human recombination hotspots identified from sperm typing studies for the  $\beta$ -globin (HOLLOWAY *et al.*, 2006) and the HLA regions (JEFFREYS *et al.*, 2001) indicated in Figures 2 and 3 in the main text. The coordinates are given in both hg15 and hg19.

| Hotspot         | chr   | hg15     |          | hg19     |          |
|-----------------|-------|----------|----------|----------|----------|
|                 |       | start    | end      | start    | end      |
| $\beta$ -globin | chr11 | 5207738  | 5208938  | 5248701  | 5249901  |
| DNA1            | chr6  | 32977952 | 32979852 | 32976505 | 32978405 |
| DNA2            | chr6  | 32974244 | 32975544 | 32972797 | 32974097 |
| DNA3            | chr6  | 32966323 | 32967522 | 32964870 | 32966070 |
| DMB1            | chr6  | 32904007 | 32905807 | 32902527 | 32904327 |
| DMB2            | chr6  | 32901655 | 32901657 | 32900176 | 32900178 |
| TAP2            | chr6  | 32805677 | 32806677 | 32804157 | 32805157 |
