# Supplementary material
Source: PubMed Central journal article supplement (PMC4256775)
Supplement: supp_114.168377_TableS3.pdf [file supp_114.168377_TableS3.pdf]

**Table S3A.** The location, BF of shared hotspot, posterior and prior probabilities of hotspot, and recombination rate for the locations within chromosome 21 with BF of shared hotspot for YRI and chimpanzee that is  $\geq 100$ . Note that the bin size was set to be 200 bp in the analysis.

| Location | BF of shared hotspot | Posterior prob. |       | Prior prob. | $\rho$ per kb |           |
|----------|----------------------|-----------------|-------|-------------|---------------|-----------|
|          |                      | YRI             | Chimp |             | YRI           | Chimp     |
| 15656560 | 285.494              | 0.870           | 0.156 | 0.023       | 31539.316     | 6929.126  |
| 15656760 | 164.886              | 0.908           | 0.092 | 0.023       | 31667.729     | 5494.949  |
| 15656960 | 111.596              | 0.971           | 0.059 | 0.023       | 31866.629     | 4600.050  |
| 16176300 | 183.542              | 0.231           | 0.398 | 0.023       | 10007.385     | 14574.489 |
| 16176500 | 213.912              | 0.191           | 0.552 | 0.023       | 10033.589     | 15936.120 |
| 16176700 | 177.297              | 0.159           | 0.562 | 0.023       | 10029.131     | 15885.957 |
| 16176900 | 140.780              | 0.131           | 0.553 | 0.024       | 9983.577      | 15879.444 |
| 16177100 | 100.458              | 0.108           | 0.485 | 0.023       | 9964.658      | 15440.234 |
| 16512113 | 147.039              | 0.232           | 0.324 | 0.023       | 10857.111     | 10928.991 |
| 17725644 | 184.334              | 0.486           | 0.190 | 0.024       | 15400.158     | 8741.137  |
| 17725844 | 188.580              | 0.481           | 0.196 | 0.023       | 15453.427     | 8987.934  |
| 17726044 | 176.494              | 0.476           | 0.186 | 0.023       | 15535.003     | 8718.583  |
| 17726244 | 159.890              | 0.472           | 0.171 | 0.023       | 15649.587     | 8516.929  |
| 17726444 | 109.519              | 0.446           | 0.127 | 0.023       | 15632.720     | 8274.600  |
| 17742085 | 101.937              | 0.018           | 0.618 | 0.011       | 6775.410      | 8969.137  |
| 17742285 | 110.475              | 0.024           | 0.751 | 0.013       | 6825.274      | 8778.151  |
| 17742485 | 108.812              | 0.029           | 0.813 | 0.015       | 6790.138      | 8620.067  |
| 17742685 | 100.120              | 0.031           | 0.857 | 0.016       | 6876.244      | 8548.510  |
| 18441284 | 227.144              | 0.841           | 0.133 | 0.024       | 27012.989     | 7350.433  |
| 19138301 | 121.491              | 0.061           | 0.990 | 0.023       | 10145.817     | 21274.234 |
| 19138501 | 228.562              | 0.110           | 0.990 | 0.023       | 11359.481     | 21274.234 |
| 19138701 | 236.943              | 0.114           | 0.990 | 0.023       | 11330.807     | 21290.425 |
| 19254018 | 138.807              | 0.266           | 0.268 | 0.024       | 5237.969      | 6057.802  |
| 19254218 | 208.283              | 0.411           | 0.251 | 0.023       | 5847.392      | 5937.443  |
| 19254418 | 176.956              | 0.656           | 0.135 | 0.023       | 6985.160      | 5191.916  |
| 19254618 | 110.026              | 0.899           | 0.064 | 0.023       | 8421.662      | 4404.301  |
| 19926150 | 134.071              | 0.856           | 0.081 | 0.023       | 9786.664      | 8080.429  |
| 19926350 | 130.642              | 0.611           | 0.110 | 0.023       | 8873.195      | 8718.400  |
| 19926550 | 109.032              | 0.445           | 0.128 | 0.023       | 8420.547      | 8935.445  |
| 20763118 | 117.891              | 0.062           | 0.980 | 0.023       | 4821.258      | 11329.398 |
| 20763318 | 167.235              | 0.087           | 0.975 | 0.024       | 5221.899      | 11306.070 |
| 20763518 | 208.727              | 0.117           | 0.883 | 0.024       | 5596.319      | 11051.005 |
| 20763718 | 196.094              | 0.144           | 0.680 | 0.023       | 5869.359      | 10940.450 |
| 20763918 | 110.488              | 0.179           | 0.320 | 0.023       | 6464.270      | 9175.157  |
| 24783846 | 188.423              | 0.931           | 0.102 | 0.024       | 7063.042      | 5412.213  |
| 24784046 | 288.036              | 0.939           | 0.147 | 0.024       | 7095.379      | 6348.382  |
| 24784246 | 301.998              | 0.955           | 0.150 | 0.024       | 7127.590      | 6090.196  |
| 24784446 | 220.955              | 0.955           | 0.114 | 0.023       | 7127.887      | 4819.261  |
| 24784646 | 154.536              | 0.945           | 0.083 | 0.023       | 7102.932      | 3928.361  |
| 24784846 | 105.676              | 0.809           | 0.068 | 0.023       | 6834.772      | 3726.665  |

**Table S3B.** The location, BF of shared hotspot, posterior and prior probabilities of hotspot, and recombination rate for the locations within chromosome 21 with BF of shared hotspot for YRI and chimpanzee that is  $\geq 100$ . Note that the bin size was set to be 200 bp in the analysis.

| Location | BF of shared hotspot | Posterior prob. |       | Prior prob. | $\rho$ per kb |           |
|----------|----------------------|-----------------|-------|-------------|---------------|-----------|
|          |                      | YRI             | Chimp |             | YRI           | Chimp     |
| 27777974 | 188.311              | 0.736           | 0.128 | 0.023       | 6599.743      | 5083.321  |
| 27778174 | 253.744              | 0.738           | 0.166 | 0.023       | 6599.454      | 5188.921  |
| 27778374 | 284.893              | 0.735           | 0.184 | 0.023       | 6608.043      | 5106.888  |
| 27778574 | 303.014              | 0.729           | 0.196 | 0.023       | 6616.955      | 4807.713  |
| 27778774 | 337.623              | 0.709           | 0.220 | 0.023       | 6638.771      | 4821.803  |
| 27778974 | 403.944              | 0.677           | 0.268 | 0.023       | 6689.960      | 5069.792  |
| 27779174 | 420.534              | 0.611           | 0.308 | 0.023       | 6642.483      | 5422.041  |
| 27779374 | 329.147              | 0.496           | 0.309 | 0.023       | 6305.686      | 5689.206  |
| 27779574 | 232.713              | 0.399           | 0.285 | 0.024       | 6051.800      | 5714.347  |
| 27779774 | 135.506              | 0.303           | 0.230 | 0.023       | 5892.818      | 5261.390  |
| 32802712 | 106.588              | 0.706           | 0.079 | 0.023       | 10935.955     | 3665.847  |
| 32802912 | 163.649              | 0.585           | 0.142 | 0.023       | 10672.446     | 4579.081  |
| 32803112 | 101.419              | 0.307           | 0.172 | 0.023       | 10012.219     | 4888.483  |
| 32810512 | 107.456              | 0.990           | 0.057 | 0.024       | 12253.264     | 7098.364  |
| 32810712 | 100.499              | 0.990           | 0.053 | 0.024       | 12241.436     | 7030.004  |
| 33231354 | 126.159              | 0.763           | 0.085 | 0.023       | 6002.980      | 17892.281 |
| 33231554 | 160.735              | 0.773           | 0.105 | 0.023       | 5999.274      | 17992.985 |
| 33231754 | 177.498              | 0.777           | 0.115 | 0.024       | 6002.654      | 17483.822 |
| 33231954 | 175.287              | 0.782           | 0.113 | 0.023       | 6030.923      | 15835.609 |
| 33232154 | 149.576              | 0.790           | 0.097 | 0.023       | 6093.150      | 13010.088 |
| 33232354 | 105.112              | 0.798           | 0.069 | 0.023       | 6181.327      | 8416.882  |
| 36526950 | 161.245              | 0.094           | 0.872 | 0.024       | 5689.540      | 12675.394 |
| 36527150 | 192.922              | 0.115           | 0.840 | 0.024       | 7023.180      | 13048.529 |
| 38639126 | 211.700              | 0.111           | 0.943 | 0.023       | 6955.501      | 7719.173  |
| 38639326 | 640.579              | 0.272           | 0.958 | 0.023       | 13896.870     | 7722.063  |
| 38639526 | 644.525              | 0.273           | 0.963 | 0.023       | 13650.934     | 7721.398  |
| 38639726 | 468.696              | 0.218           | 0.945 | 0.024       | 11312.170     | 7696.826  |
| 38639926 | 229.270              | 0.165           | 0.683 | 0.023       | 9802.986      | 7655.443  |
| 39039063 | 211.825              | 0.241           | 0.420 | 0.023       | 5590.545      | 17544.685 |
| 39039263 | 532.540              | 0.331           | 0.670 | 0.023       | 5842.511      | 19470.258 |
| 39039463 | 774.496              | 0.355           | 0.830 | 0.023       | 5846.362      | 20047.953 |
| 39039663 | 900.318              | 0.331           | 0.990 | 0.023       | 5515.199      | 20643.148 |
| 39039863 | 832.826              | 0.315           | 0.990 | 0.023       | 5368.431      | 20658.812 |
| 39040063 | 239.249              | 0.304           | 0.381 | 0.023       | 5355.595      | 20690.915 |

**Table S3C.** The location, BF of shared hotspot, posterior and prior probabilities of hotspot, and recombination rate for the locations within chromosome 21 with BF of shared hotspot for YRI and chimpanzee that is  $\geq 100$ . Note that the bin size was set to be 200 bp in the analysis.

| Location | BF of shared hotspot | Posterior prob. |       | Prior prob. | $\rho$ per kb |           |
|----------|----------------------|-----------------|-------|-------------|---------------|-----------|
|          |                      | YRI             | Chimp |             | YRI           | Chimp     |
| 40014559 | 129.356              | 0.078           | 0.857 | 0.024       | 5695.848      | 11674.009 |
| 40014759 | 183.894              | 0.108           | 0.855 | 0.024       | 6243.054      | 11712.068 |
| 40014959 | 239.070              | 0.137           | 0.855 | 0.024       | 6727.649      | 11733.253 |
| 40015159 | 270.714              | 0.154           | 0.848 | 0.024       | 6943.860      | 11781.198 |
| 40015359 | 287.940              | 0.168           | 0.822 | 0.024       | 7660.602      | 11845.215 |
| 40015559 | 166.870              | 0.160           | 0.527 | 0.024       | 7913.520      | 10115.673 |
| 40276752 | 168.105              | 0.172           | 0.493 | 0.023       | 14171.093     | 8830.327  |
| 40276952 | 528.521              | 0.737           | 0.307 | 0.024       | 22147.608     | 8162.475  |
| 40277152 | 297.215              | 0.775           | 0.183 | 0.024       | 22035.319     | 7650.460  |
| 40316392 | 133.867              | 0.117           | 0.573 | 0.023       | 3102.026      | 4172.360  |
| 40316592 | 159.642              | 0.136           | 0.581 | 0.023       | 3226.749      | 4225.450  |
| 40316792 | 184.309              | 0.152           | 0.597 | 0.023       | 3354.056      | 4403.064  |
| 40316992 | 198.542              | 0.163           | 0.597 | 0.023       | 3442.941      | 4415.224  |
| 40317192 | 204.654              | 0.171           | 0.591 | 0.023       | 3471.018      | 4379.222  |
| 40317392 | 199.521              | 0.181           | 0.548 | 0.023       | 3512.845      | 4147.033  |
| 40317592 | 188.951              | 0.195           | 0.483 | 0.023       | 3608.689      | 4063.566  |
| 40317792 | 181.629              | 0.216           | 0.421 | 0.023       | 4183.590      | 4049.927  |
| 40317992 | 168.738              | 0.238           | 0.358 | 0.023       | 4987.293      | 4058.472  |
| 40318192 | 137.340              | 0.248           | 0.285 | 0.024       | 5112.354      | 4012.951  |
| 41143825 | 181.261              | 0.462           | 0.198 | 0.024       | 6220.698      | 3541.143  |
| 41144025 | 210.568              | 0.526           | 0.199 | 0.024       | 6247.228      | 3489.888  |
| 41144225 | 244.985              | 0.591           | 0.202 | 0.024       | 6446.650      | 3453.253  |
| 41144425 | 262.282              | 0.617           | 0.206 | 0.024       | 6570.222      | 3451.275  |
| 41144625 | 251.811              | 0.584           | 0.210 | 0.024       | 6439.340      | 3465.952  |
| 41144825 | 220.723              | 0.513           | 0.212 | 0.024       | 6291.991      | 3475.548  |
| 41145025 | 205.815              | 0.477           | 0.214 | 0.024       | 6201.248      | 3479.447  |
| 41145225 | 205.056              | 0.476           | 0.214 | 0.023       | 6370.582      | 3472.832  |
| 41145425 | 199.117              | 0.461           | 0.214 | 0.023       | 6433.713      | 3477.599  |
| 41145625 | 167.788              | 0.394           | 0.215 | 0.023       | 6270.621      | 3481.081  |
| 41277919 | 209.166              | 0.177           | 0.477 | 0.021       | 6037.182      | 10536.394 |
| 41278119 | 321.375              | 0.252           | 0.514 | 0.021       | 6771.420      | 10607.349 |
| 41278319 | 321.469              | 0.256           | 0.523 | 0.022       | 6729.899      | 10593.630 |
| 41278519 | 295.549              | 0.245           | 0.519 | 0.022       | 6383.708      | 10598.074 |
| 41278719 | 250.905              | 0.227           | 0.494 | 0.022       | 5954.922      | 10656.032 |
| 41278919 | 170.159              | 0.192           | 0.416 | 0.023       | 5525.400      | 10736.870 |
| 41383598 | 121.176              | 0.190           | 0.330 | 0.023       | 7128.685      | 6481.764  |
| 41383798 | 217.252              | 0.234           | 0.457 | 0.023       | 8032.590      | 6753.986  |
| 41383998 | 301.386              | 0.214           | 0.666 | 0.023       | 7475.461      | 7357.192  |
| 41384198 | 268.828              | 0.183           | 0.710 | 0.024       | 6950.994      | 7398.506  |
| 41384398 | 222.401              | 0.147           | 0.746 | 0.024       | 6662.363      | 7435.505  |
| 41384598 | 153.612              | 0.103           | 0.761 | 0.024       | 6467.212      | 7450.173  |
| 41612186 | 104.358              | 0.074           | 0.736 | 0.023       | 11466.139     | 12251.212 |

**Table S3D.** The location, BF of shared hotspot, posterior and prior probabilities of hotspot, and recombination rate for the locations within chromosome 21 with BF of shared hotspot for YRI and chimpanzee that is  $\geq 100$ . Note that the bin size was set to be 200 bp in the analysis.

| Location | BF of shared hotspot | Posterior prob. |       | Prior prob. | $\rho$ per kb |           |
|----------|----------------------|-----------------|-------|-------------|---------------|-----------|
|          |                      | YRI             | Chimp |             | YRI           | Chimp     |
| 42059206 | 135.427              | 0.209           | 0.139 | 0.015       | 12562.039     | 11208.861 |
| 42059406 | 131.325              | 0.211           | 0.163 | 0.016       | 13694.442     | 11318.255 |
| 42226149 | 626.224              | 0.920           | 0.011 | 0.004       | 12325.392     | 5020.142  |
| 42226349 | 410.638              | 0.972           | 0.024 | 0.008       | 12264.831     | 5103.089  |
| 42226549 | 481.869              | 0.986           | 0.052 | 0.011       | 12222.542     | 5750.803  |
| 42226749 | 596.665              | 0.983           | 0.092 | 0.013       | 12158.181     | 8700.793  |
| 42226949 | 655.856              | 0.979           | 0.129 | 0.015       | 12129.305     | 9504.365  |
| 42227149 | 501.579              | 0.775           | 0.155 | 0.016       | 12079.859     | 9233.073  |
| 42227349 | 168.123              | 0.289           | 0.174 | 0.018       | 10833.864     | 9022.659  |
| 42238349 | 107.716              | 0.735           | 0.076 | 0.023       | 21446.246     | 8928.534  |
| 42570781 | 115.065              | 0.310           | 0.192 | 0.023       | 6233.344      | 7506.878  |
| 42570981 | 108.709              | 0.324           | 0.175 | 0.024       | 6480.774      | 6740.126  |
| 42571181 | 107.410              | 0.307           | 0.183 | 0.024       | 6578.037      | 6684.103  |
| 42571381 | 104.378              | 0.249           | 0.220 | 0.024       | 6368.259      | 7095.729  |
| 42819800 | 105.549              | 0.970           | 0.056 | 0.023       | 11806.235     | 5158.828  |
| 42820000 | 292.836              | 0.958           | 0.145 | 0.023       | 11831.413     | 7030.569  |
| 42820200 | 356.870              | 0.521           | 0.315 | 0.023       | 9029.626      | 9422.601  |
| 42820400 | 225.951              | 0.312           | 0.355 | 0.023       | 6618.535      | 9853.427  |
| 42820600 | 180.871              | 0.259           | 0.351 | 0.023       | 6419.125      | 9837.760  |
| 43897282 | 3060835.838          | 0.990           | 0.990 | 0.004       | 40191.718     | 90686.510 |
| 43897482 | 150708.119           | 0.957           | 0.938 | 0.008       | 40266.913     | 89782.656 |
| 43897682 | 561.031              | 0.430           | 0.137 | 0.011       | 37978.474     | 28271.525 |
| 46327614 | 191.394              | 0.232           | 0.412 | 0.023       | 6406.955      | 10933.605 |
| 46327814 | 1020.907             | 0.443           | 0.812 | 0.023       | 7173.002      | 11046.233 |
| 46328014 | 2208.526             | 0.610           | 0.899 | 0.023       | 7994.535      | 11116.588 |
| 46328214 | 2598.796             | 0.644           | 0.912 | 0.023       | 8039.030      | 11142.919 |
| 46328414 | 2488.649             | 0.650           | 0.889 | 0.023       | 8014.472      | 11157.102 |
| 46328614 | 1481.975             | 0.642           | 0.700 | 0.023       | 8010.726      | 10980.290 |
| 46328814 | 362.140              | 0.623           | 0.267 | 0.023       | 7975.626      | 9450.552  |
| 46329014 | 132.833              | 0.614           | 0.111 | 0.024       | 7968.658      | 8636.293  |
| 46813401 | 282.342              | 0.247           | 0.427 | 0.020       | 8419.912      | 9646.114  |
| 46813601 | 2236.206             | 0.842           | 0.590 | 0.021       | 11898.599     | 10162.635 |
| 46813801 | 2676.036             | 0.885           | 0.625 | 0.021       | 11932.661     | 10520.865 |
| 46814001 | 1655.596             | 0.736           | 0.602 | 0.022       | 11264.752     | 10452.088 |
| 46814201 | 284.072              | 0.326           | 0.376 | 0.022       | 8426.337      | 9852.642  |
| 47272127 | 111.177              | 0.383           | 0.151 | 0.023       | 9433.282      | 11739.240 |
| 47305828 | 247.356              | 0.161           | 0.745 | 0.023       | 21436.346     | 9604.348  |
| 47306028 | 1960.835             | 0.952           | 0.545 | 0.023       | 32402.412     | 9181.073  |
