# Supplementary material
Source: PubMed Central journal article supplement (PMC4256775)
Supplement: supp_114.168377_TableS4.pdf [file supp_114.168377_TableS4.pdf]

**Table S4.** The location, BF of shared hotspot, posterior and prior probabilities of hotspot, and recombination rate for the locations within  $\beta$ -globin region with BF of shared hotspot for Beni and chimpanzee that is  $\geq 100$ . Note that the bin size was set to be 200 bp in the analysis.

| Location | BF of shared hotspot | Posterior prob. |       | Prior prob. |       | $\rho$ per kb |         |
|----------|----------------------|-----------------|-------|-------------|-------|---------------|---------|
|          |                      | Beni            | Chimp | Beni        | Chimp | Beni          | Chimp   |
| 5207191  | 135.56               | 0.08            | 0.89  | 0.02        | 0.02  | 13586.45      | 8816.91 |
| 5207391  | 355.93               | 0.21            | 0.79  | 0.02        | 0.02  | 15075.34      | 8714.64 |
| 5207591  | 842.27               | 0.50            | 0.64  | 0.02        | 0.02  | 17242.87      | 8537.15 |
| 5207791  | 1274.07              | 0.81            | 0.51  | 0.02        | 0.02  | 18809.18      | 8420.40 |
| 5207991  | 1350.57              | 0.96            | 0.45  | 0.02        | 0.02  | 20149.54      | 8419.20 |
| 5208191  | 1286.51              | 0.99            | 0.42  | 0.02        | 0.02  | 20258.55      | 8418.88 |
| 5208391  | 1241.97              | 0.99            | 0.41  | 0.02        | 0.02  | 20194.92      | 8400.70 |
| 5208591  | 1180.78              | 0.99            | 0.40  | 0.02        | 0.02  | 20197.72      | 8427.60 |
| 5208791  | 884.80               | 0.99            | 0.33  | 0.02        | 0.02  | 20227.12      | 8566.47 |
| 5208991  | 290.92               | 0.98            | 0.14  | 0.02        | 0.02  | 20220.12      | 8529.29 |
