# Supplementary material
Source: PubMed Central journal article supplement (PMC4256775)
Supplement: supp_114.168377_TableS5.pdf [file supp_114.168377_TableS5.pdf]

**Table S5.** The location, BF of shared hotspot, posterior and prior probabilities of hotspot, and recombination rate for the locations within  $\beta$ -globin region with BF of shared hotspot for CEPH and chimpanzee that is  $\geq 100$ . Note that the bin size was set to be 200 bp in the analysis.

| Location | BF of shared hotspot | Posterior prob. |       | Prior prob. |       | $\rho$ per kb |         |
|----------|----------------------|-----------------|-------|-------------|-------|---------------|---------|
|          |                      | CEPH            | Chimp | CEPH        | Chimp | CEPH          | Chimp   |
| 5206961  | 371.22               | 0.18            | 0.93  | 0.02        | 0.02  | 18326.23      | 8852.13 |
| 5207161  | 839.78               | 0.36            | 0.89  | 0.02        | 0.02  | 18673.54      | 8816.91 |
| 5207361  | 1331.00              | 0.54            | 0.79  | 0.02        | 0.02  | 19411.68      | 8714.64 |
| 5207561  | 1511.18              | 0.71            | 0.64  | 0.02        | 0.02  | 20566.67      | 8537.15 |
| 5207761  | 1328.14              | 0.83            | 0.51  | 0.02        | 0.02  | 21541.59      | 8420.40 |
| 5207961  | 1256.48              | 0.92            | 0.45  | 0.02        | 0.02  | 22266.50      | 8419.20 |
| 5208161  | 1286.98              | 0.99            | 0.42  | 0.02        | 0.02  | 22760.68      | 8418.88 |
| 5208361  | 1243.76              | 0.99            | 0.41  | 0.02        | 0.02  | 22787.70      | 8400.70 |
| 5208561  | 1180.72              | 0.99            | 0.40  | 0.02        | 0.02  | 22788.52      | 8427.60 |
| 5208761  | 883.43               | 0.99            | 0.33  | 0.02        | 0.02  | 22787.79      | 8566.47 |
| 5208961  | 295.27               | 0.99            | 0.14  | 0.02        | 0.02  | 22814.71      | 8529.29 |
