# Supplementary material
Source: PubMed Central journal article supplement (PMC4256775)
Supplement: supp_114.168377_TableS6.pdf [file supp_114.168377_TableS6.pdf]

**Table S6.** The location, BF of shared hotspot, posterior and prior probabilities of hotspot, and recombination rate for the locations within HLA region with BF of shared hotspot for Beni and chimpanzee that is  $\geq 100$ . Note that the bin size was set to be 200 bp in the analysis.

| Location | BF of shared hotspot | Posterior prob. |       | Prior prob. |       | $\rho$ per kb |          |
|----------|----------------------|-----------------|-------|-------------|-------|---------------|----------|
|          |                      | Beni            | Chimp | Beni        | Chimp | Beni          | Chimp    |
| 32806970 | 143.693              | 0.485           | 0.146 | 0.022       | 0.024 | 13405.120     | 6546.155 |
| 32807170 | 148.140              | 0.449           | 0.163 | 0.023       | 0.024 | 13494.462     | 7360.673 |
